# Supplementary material for: Comparative Study of the Nutritional Composition and Antioxidant Ability of Soups Made from Wild and Farmed Snakehead Fish (Channa Argus)
Source: MDPI journal article supplement (doi:10.3390/foods11203294), 2022-10-21
Supplement: s1 [file s1]

# Supplementary Materials:

**Table S1.** Food nutritional composition and growth environment of farmed and wild snakehead fish

| Food              | Farmed                                       |             | Wild                     |            |                    |            |              |            |
|-------------------|----------------------------------------------|-------------|--------------------------|------------|--------------------|------------|--------------|------------|
|                   | Feed [1-3]                                   |             | Trash fish [4-7]         |            | River prawns [8,9] |            | Frog [10,11] |            |
|                   | Wet base                                     | Dry base    | Wet base                 | Dry base   | Wet base           | Dry base   | Wet base     | Dry base   |
| Moisture          | 10.0~12.5                                    |             | 69.5~75.88               |            | 71.0~81.3          |            | 78.14~85.87  |            |
| Crude protein     | 40.0~45.0                                    | 44.44~51.43 | 16.09~19.5               | 58.62~64.1 | 15.18~20.          | 66.0~71.72 | 10.81~19.07  | 76.50~87.2 |
|                   |                                              |             | 5                        | 0          | 8                  |            |              | 4          |
| Crude fat         | 5.0~6.0                                      | 5.56~6.86   | 2.59~4.51                | 10.74~16.4 | 1.9~2.68           | 10.16~11.3 | 0.17~0.90    | 0.92~6.37  |
|                   |                                              |             |                          | 3          |                    | 7          |              |            |
| Fiber             | 5.0~8.0                                      | 5.56~9.14   | -                        | -          | -                  | -          | -            | -          |
| Crude ash         | 14.0~18.0                                    | 15.56~20.57 | 0.91~3.85                | 3.32~15.96 | 1.5~4.0            | 5.17~21.29 | 0.52~1.1     | 3.68~5.52  |
| Calcium           | 0.5~5.0                                      | 0.56~5.71   | 0.29~1.10                | 0.95~4.48  | 0.23~1.04          | 0.80~4.41  | 0.0107~0.49  | 0.054~3.47 |
| Phosphorus        | 0.5~5.0                                      | 0.56~5.71   | 0.57~0.69                | 1.87~2.82  | 0.047~0.7          | 0.16~3.22  | 0.0064~0.91  | 0.032~4.82 |
|                   |                                              |             |                          |            | 6                  |            |              |            |
| Amino acid        | 2.1~2.3                                      | 2.33~2.63   | -                        | -          | -                  | -          | -            | -          |
| Habitual density  | 3000~6000 tails/30m2 l                       |             | <10 tails                |            |                    |            |              |            |
| Illumination      | High light intensity                         |             | Low light intensity      |            |                    |            |              |            |
| Water temperature | The temperature is stable with slight change |             | Great temperature change |            |                    |            |              |            |
| Way of eating     | Feed on time                                 |             | Hunting                  |            |                    |            |              |            |

## References:

1. Feed A consists of imported fish meal, starch, soybean meal, fish oil, calcium dihydrogen phosphate, vitamins, multivitamins and organic trace elements. The ingredients refer to the nutrient composition table of snakehead feed, which comes from Zhejiang Dongyu Biotechnology Co., Ltd.;
2. Feed B consists of imported high-quality fish meal, flour, soybean meal, yeast powder, organic chelated minerals, multiple vitamins, trace elements, etc. The ingredients refer to the nutrient composition table of snakehead feed, which comes from Jiangmen Hengsheng Industrial Co., Ltd.
3. Zhejiang Lianxing Feed Technology Co., Ltd. An extruded compound feed for blackfish: CN201510830228.8.2016-03-30.
4. Wang, Y.H.; Ding, W.; Chen, J.; Wang, H. C.; Luo, G. L.; Xing, J.; Xin, J. Q. Effects of feeding compound feed and chilled trash fish on the growth rate and feed cost of turbot. *Jiangsu Agricultural Science* **2016**, *44*(07):282-285.
5. Li, J. Q.; Lin, J. B.; Zhu, Q. G.; Li, C. L. A comparative experiment on the effect of artificial compound feed and small trash fish on raising red-spotted grouper. *Taiwan Strait* **2004** (02): 167-173.
6. Huang, Z. C.; Chen, D. H.; Lin, J. B.; Lin, K. B.; Zhu, Q. G.; Liang, P.; Zheng, L. Y.; and Qiu, F. Y. Effects of compound feed and small trash fish on the growth performance of grouper oblique. *Feed Research* **2012**(09): 1-4.
7. Chen, D. H.; Zheng, L. Y.; Lin, J. B.; Zhu, Q. G.; Liang, P.; Lin, K. B.; Huang, Z. C.; Qiu, M. L. Study on the effects of different feeds and small trash fish on the growth and immunity of grouper serrata. *Journal of Fujian Agriculture* **2013**, *28*(04):309-314.
8. Cui, J.; Meng, C.; Liu, B. L.; Li, W. D. Nutrient content and evaluation of five main species of freshwater shrimp in Anhui Province. *Health Research* **2020**, *49*(06): 962-968.
9. Zhuang, P.; Song, C.; Zhang, L. Z. Nutrient composition comparison between white shrimp and *Macrobrachium japonicus* in the Yangtze Estuary. *Journal of Zoology* **2008**(04):822-829.
10. He, X. R.; Wang, X. Q.; Fan, W. J.; Zhou, X. W. Biological characteristics and nutritional composition analysis of Sangzhi toe ditch frog. *Journal of Hunan Agricultural University (Natural Science Edition)* **2008**(04):482-484.
11. Ouyang, F.; Chen, Z.; Shi, L.; Chen, X. H. Analysis of the nutritional components of the anal frog of Taihang longa. *Journal of Tianjin Normal University (Natural Science Edition)* **2015**, *35*(03):128-129+136.

**Figure S1****Farmed snakehead****Aspect ratio:**  $4.74 \pm 0.16b$ **BMI:**  $5.20 \pm 0.26a$ 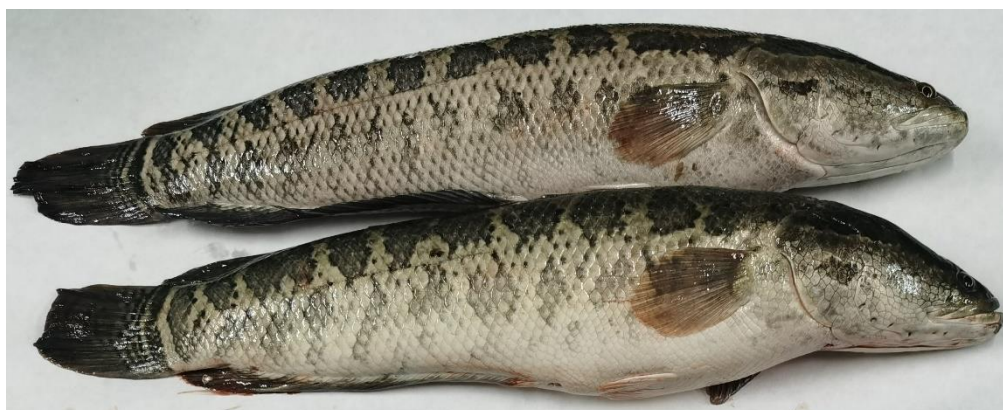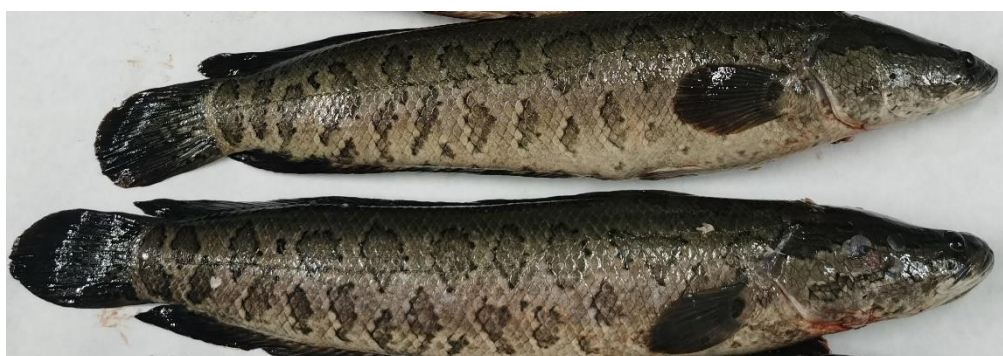**Wild snakehead****Aspect ratio:**  $5.81 \pm 0.04a$ **BMI:**  $4.24 \pm 0.11b$ 

**Figure S1.** Appearance and morphological parameters of farmed and wild snakehead fish. Different lowercase letters indicate significant difference in the body mass index between the farmed and wild snakehead fish ( $P < 0.05$ )

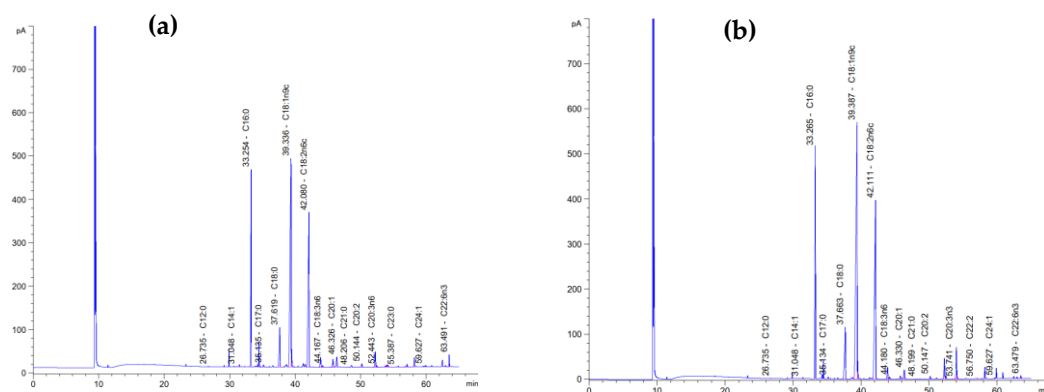

**Figure S2.** The GC-MS chromatogram of fatty acid analysis. a: farmed snakehead fish soup; b: wild snakehead fish soup.
